# Supplementary material for: Nature of the 1/f noise in graphene—direct evidence for the mobility fluctuation mechanism
Source: Royal Society of Chemistry journal article supplement (doi:10.1039/d2nr00207h), 2022-01-01
Supplement: d2nr00207h1.pdf [file d2nr00207h1.pdf]

## Supplemental Information

### Nature of the $1/f$ Noise in Graphene – Direct Evidence for the Mobility Fluctuations

#### Mechanism

Adil Rehman<sup>1</sup>, Juan Antonio Delgado Notario<sup>1</sup>, Juan Salvador Sanchez<sup>2</sup>, Yahya Moubarak Meziani<sup>2</sup>, Grzegorz Cywiński<sup>1</sup>, Wojciech Knap<sup>1</sup>, Alexander A. Balandin<sup>3</sup>, Michael Levinshtein<sup>4</sup>, Sergey Rumyantsev<sup>1</sup>

<sup>1</sup>. CENTERA Laboratories, Institute of High-Pressure Physics, Polish Academy of Sciences, Warsaw 01-142, Poland

<sup>2</sup>. Nanotechnology Group, USAL-Nanolab, Universidad de Salamanca, Salamanca 37008, Spain

<sup>3</sup>. Nano-Device Laboratory, Department of Electrical and Computer Engineering, University of California, Riverside, California 92521, USA

<sup>4</sup>. Ioffe Physical-Technical Institute, St. Petersburg 194021, Russia

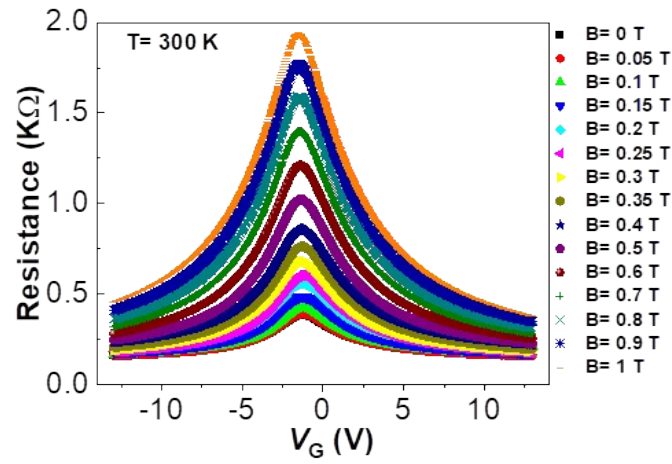

**Fig. S1** Transfer I-Vg characteristics of h-BN encapsulated graphene field effect transistor at various magnetic field.

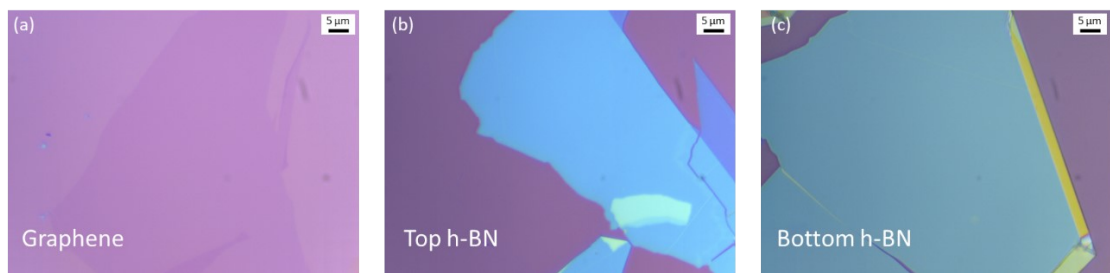

**Fig. S2** Optical images of the exfoliated 2D materials. (a) Graphene (b) top h-BN and (c) bottom h-BN flakes exfoliated on a  $\text{SiO}_2/\text{Si}$  (300 nm of  $\text{SiO}_2$ ) substrate before the staking.

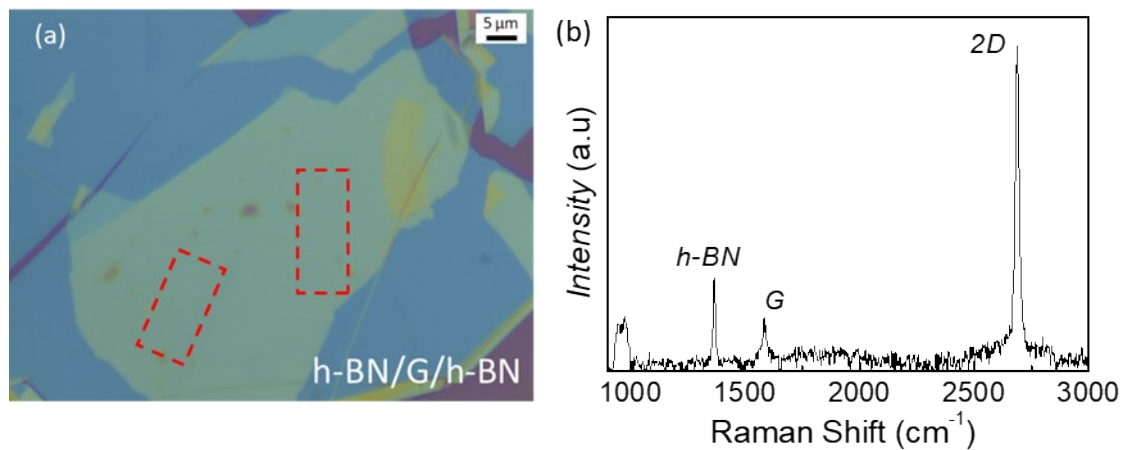

**Fig. S3** Optical and Raman spectra of graphene device. (a) Optical image of the final heterostructure (h-BN/Graphene/h-BN) fabricated where the red dashed lines highlight two clean areas used for the GFETs fabrication and (b) its single point Raman spectra, where we found a  $I_{2D}/I_G$  peak ratio around 6.

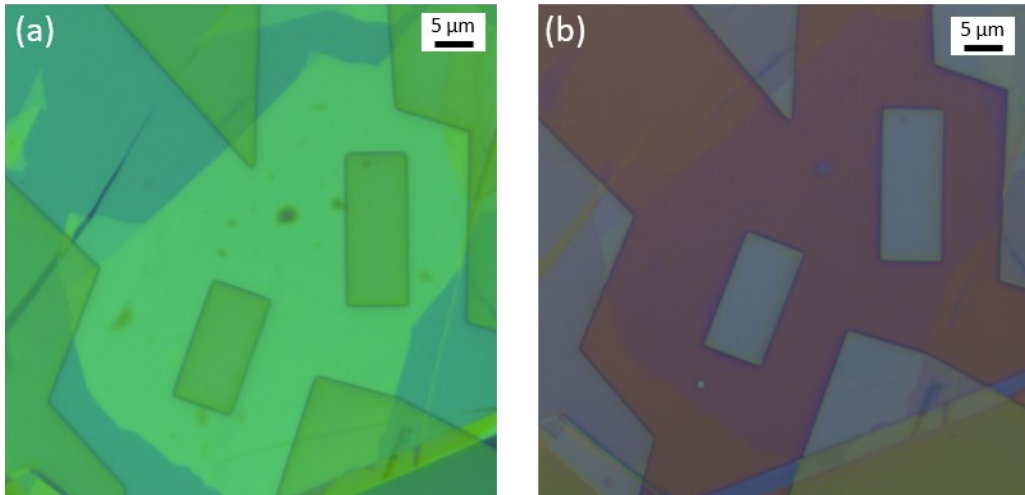

**Fig. S4** Optical image of the graphene based heterostructure. (a) after the e-beam lithography process where two bars were defined and (b) after the dry etching process where the resist was used as mask.

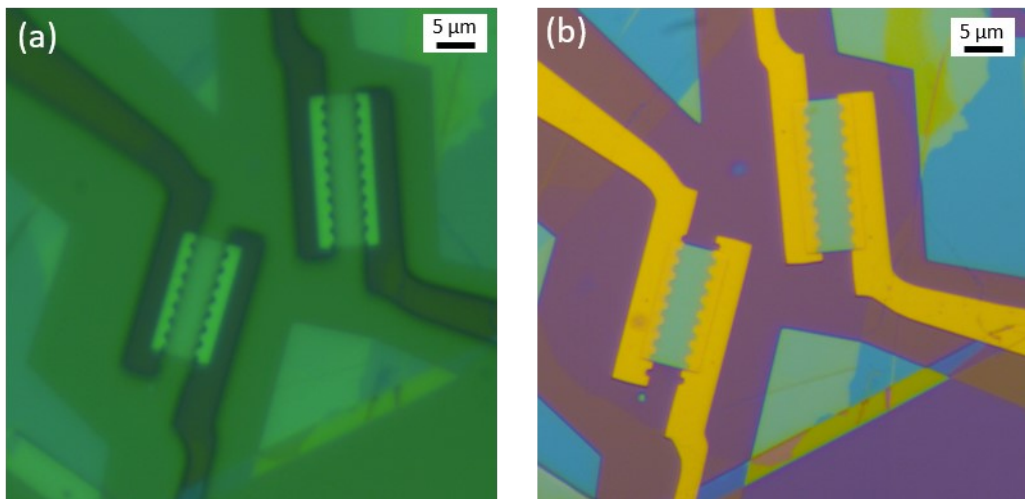

**Fig. S5** Optical image of the graphene based heterostructure. (a) after the second round of e-beam lithography process where drain and source contacts were patterned and (b) the final graphene FET where drain and source contacts were metallized.
